# Supplementary material for: Fluorescent cross-linked supramolecular polymers constructed from a novel self-complementary AABB-type heteromultitopic monomer
Source: Royal Society of Chemistry journal article supplement (doi:10.1039/c6ob00064a), 2016-01-01
Supplement: c6ob00064a1.pdf [file c6ob00064a1.pdf]

Supporting Information for

**Fluorescent cross-linked supramolecular polymers  
constructed from a novel self-complementary AABB-type  
heteromultitopic monomer**

Le Fang,<sup>a</sup> Yuanli Hu,<sup>b</sup> Qiang Li,<sup>a</sup> Shutao Xu,<sup>c</sup> Manivannan Kalavathi Dhinakarank,<sup>a</sup> Weitao

Gong,<sup>\*a</sup> and Guiling Ning<sup>\*a</sup>

<sup>a</sup> State Key Laboratory of Fine Chemicals, School of Chemical Engineering, School of Chemistry, Dalian University of Technology, Dalian 116024, P. R. China.

Fax: +86-411-84986067; E-mail: [wtgong@dlut.edu.cn](mailto:wtgong@dlut.edu.cn).

<sup>b</sup> State Key Laboratory of Catalysis, Dalian Institute of Chemical Physic, Chinese Academy of Sciences, Dalian 116023, P. R. China

<sup>c</sup> National Engineering Laboratory for Methanol to Olefins, Dalian National Laboratory for Clean Energy, Dalian Institute of Chemical Physics, Chinese Academy of Sciences, Dalian 116023, P. R. China

## 1. Synthesis procedure.

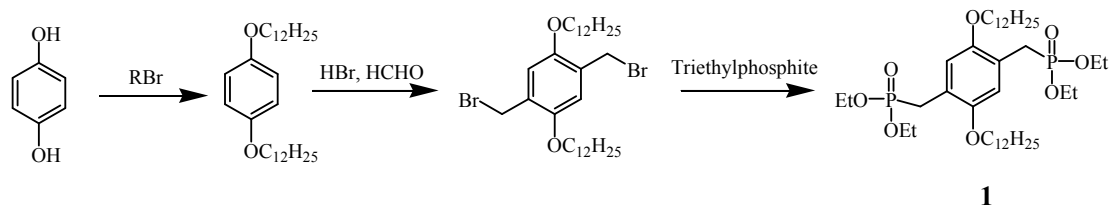

**Scheme. S1** Synthetic route for compound **1**.

Compound **1** and compound **2** were synthesized according to the procedures reported before.<sup>[S1-S3]</sup>

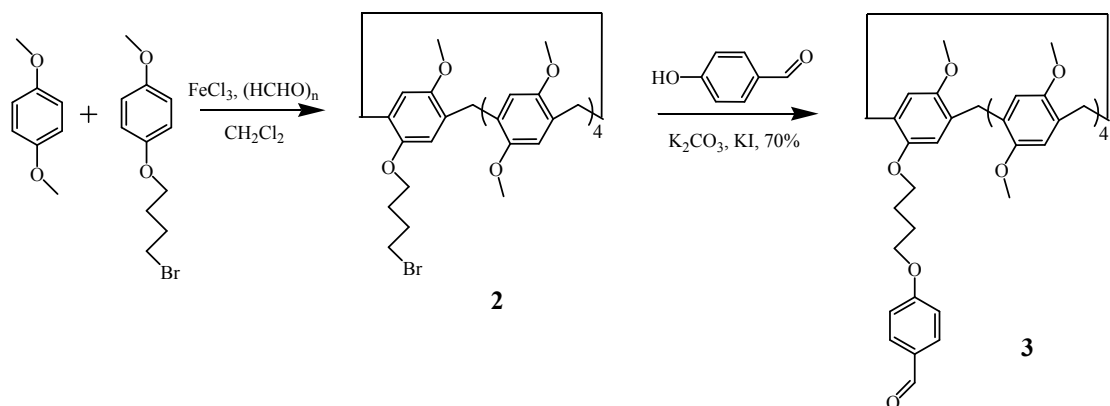

**Scheme. S2** Synthetic route for compound **3**

### Synthesis of compound **3**

To a solution of p-hydroxybenzaldehyde (0.35 g, 2.87 mmol) in DMF (20 mL) was added  $K_2CO_3$  (0.60 g, 4.3 mmol) and KI (0.07 g, 0.43 mmol). After stirring for 0.5 hour under  $80^\circ C$ , compound **2** (2.5 g, 2.87 mmol) in DMF (10 mL) was added dropwise. The reaction mixture was stirred at  $80^\circ C$  for another 10 hours. After cooling to room temperature,

the mixture was filtered through celite and DMF was evaporated under vacuum. Then the residue was dissolved in CH<sub>2</sub>Cl<sub>2</sub> (100 mL), washed with H<sub>2</sub>O (2×100 mL) and brine (2×100 mL), and dried over anhydrous MgSO<sub>4</sub>. The organic layer was evaporated under vacuum and subjected to column chromatography on silica gel using CH<sub>2</sub>Cl<sub>2</sub> as the eluent. Compound **3** was obtained as a white solid (1.85 g, 70%). <sup>1</sup>H NMR (400 MHz, CDCl<sub>3</sub>, 298 K) δ 9.89 (s, 1H), 7.82 (d, J = 8.1 Hz, 2H), 6.94 (d, J = 8.2 Hz, 2H), 6.82 – 6.69 (m, 10H), 3.99 (t, J = 5.4 Hz, 2H), 3.91 (d, J = 5.6 Hz, 2H), 3.77 (d, J = 5.1 Hz, 10H), 3.63 (d, J = 15.4 Hz, 27H), 1.92 (m, 4H). <sup>13</sup>C NMR (126 MHz, CDCl<sub>3</sub>, 298K) δ 190.8 (s), 164.1 (s), 150.9-150.6 (m), 149.8 (s), 132.0 (s), 129.9 (s), 128.5 – 128.1 (m), 115.0 (s), 114.8 (s), 114.2-113.8 (m), 77.3 (s), 77.0 (s), 76.8 (s), 67.9 (d, J = 6.3 Hz), 56.0-55.6 (m), 52.9 (s), 29.9-29.3 (m), 26.2 (s), 26.0 (s). MS (MALDI-TOF) calcd for C<sub>55</sub>H<sub>60</sub>O<sub>12</sub>, *m/z* = 912.4085 [M]<sup>+</sup>, Found: *m/z* = 912.4112.

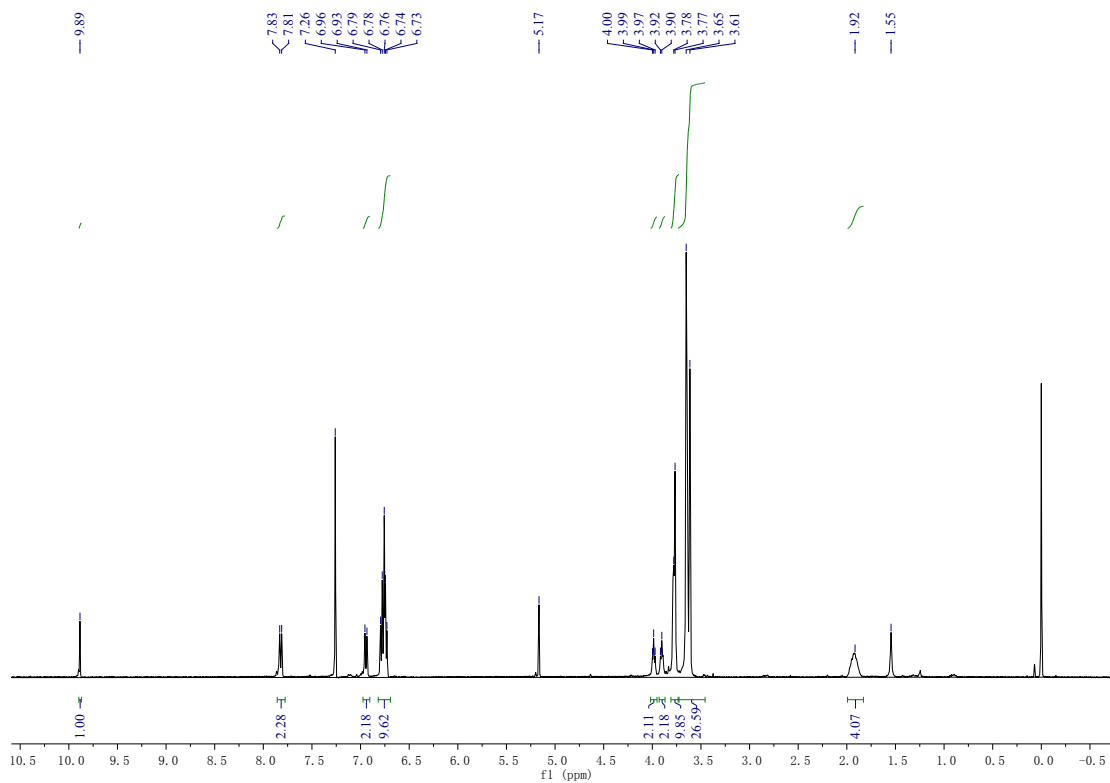

Fig. S1  $^1\text{H}$  NMR (400 MHz,  $\text{CDCl}_3$ , 298 K) of **3**.

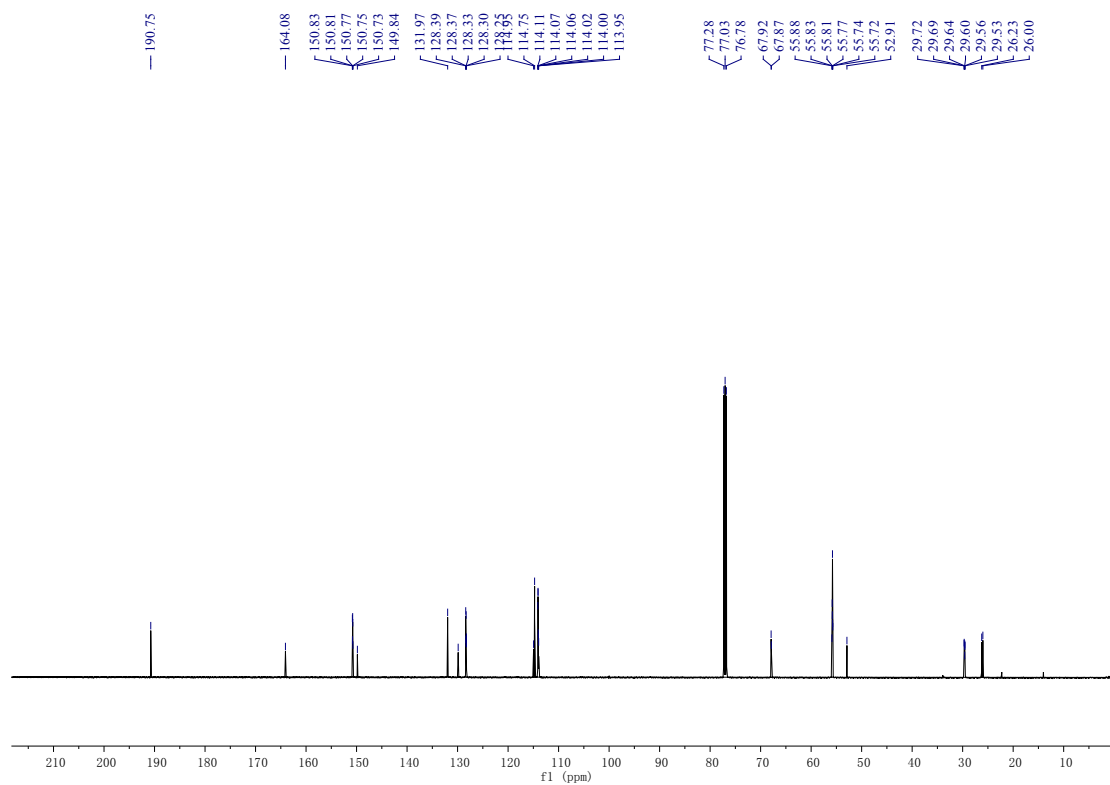

Fig. S2  $^{13}\text{C}$  NMR (126 MHz,  $\text{CDCl}_3$ , 298 K) of **3**.

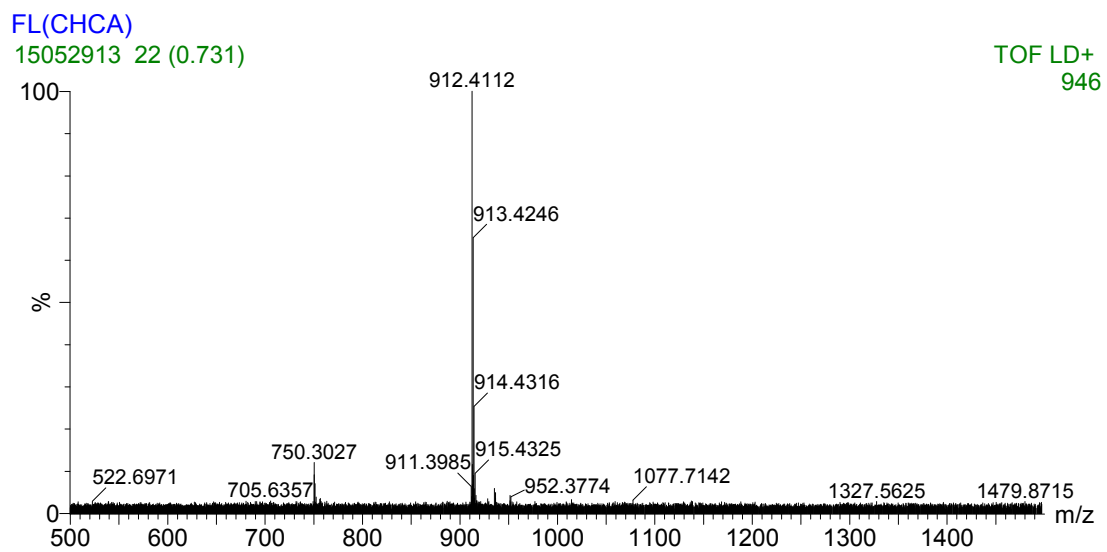

Fig. S3 MALDI-TOF MS spectrum of **3**.

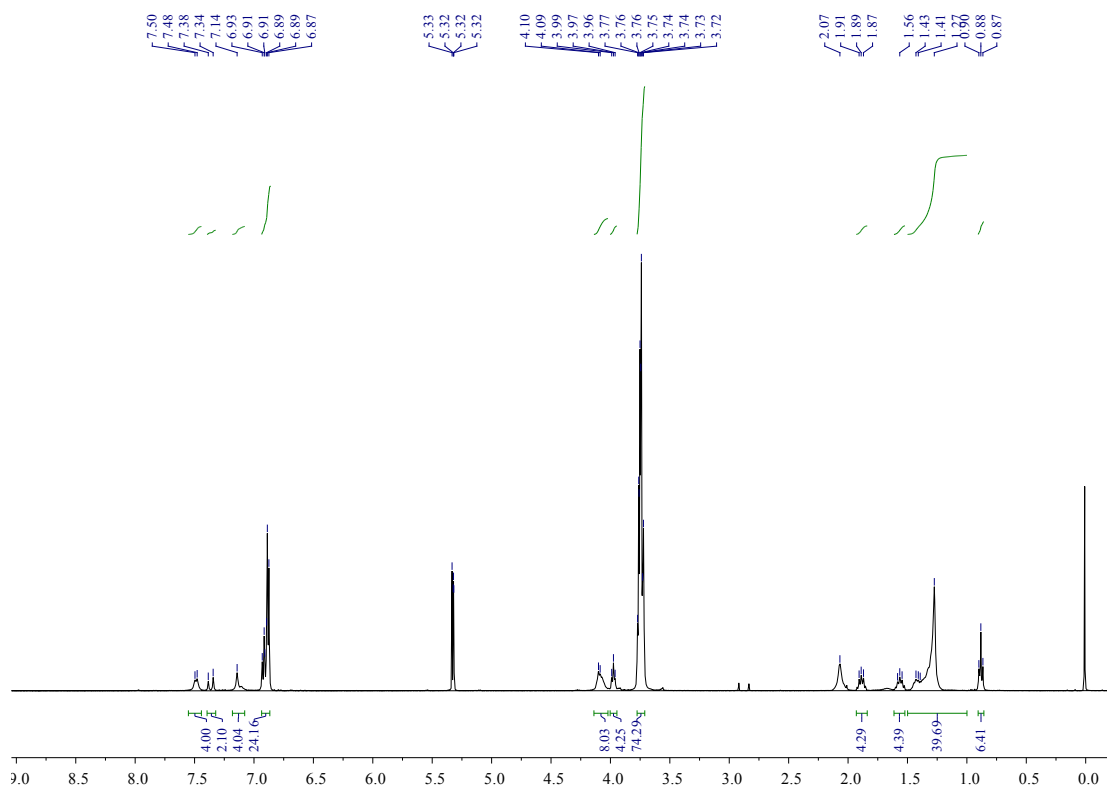

Fig. S4  $^1\text{H}$  NMR (400 MHz,  $\text{CD}_2\text{Cl}_2$ , 298 K) of APOPV.

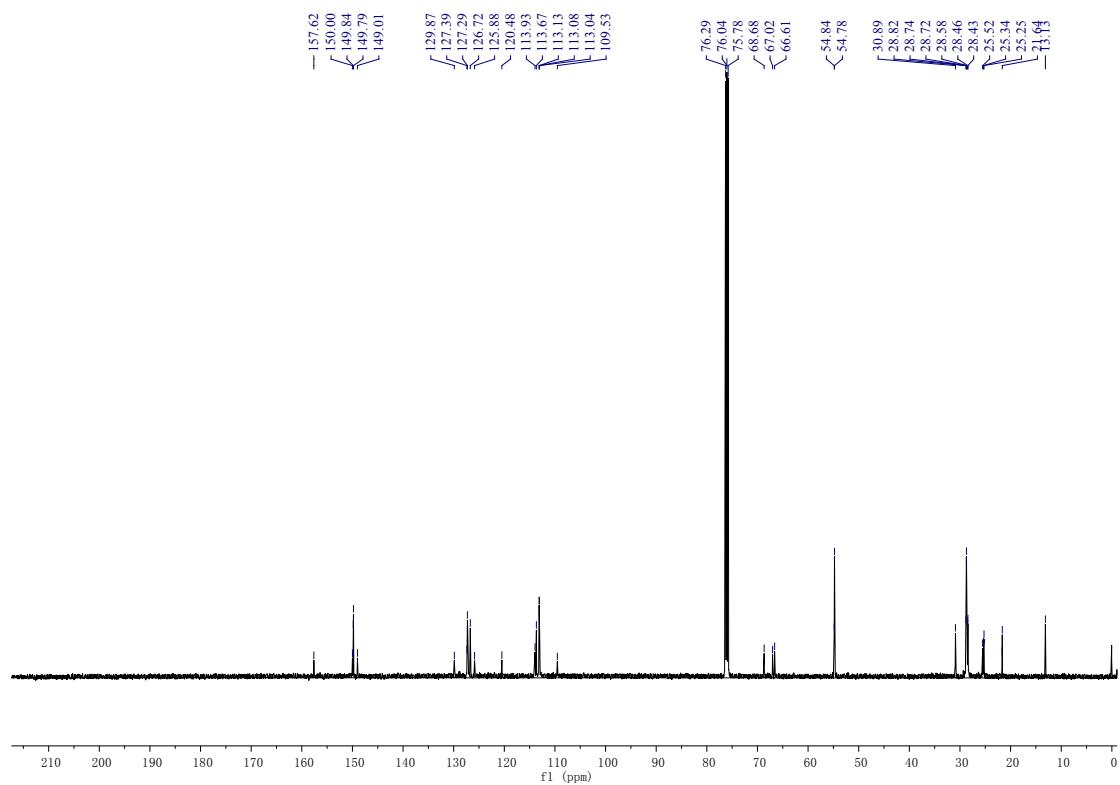

Fig. S5  $^{13}\text{C}$  NMR (126 MHz,  $\text{CDCl}_3$ , 298 K) of APOPV.

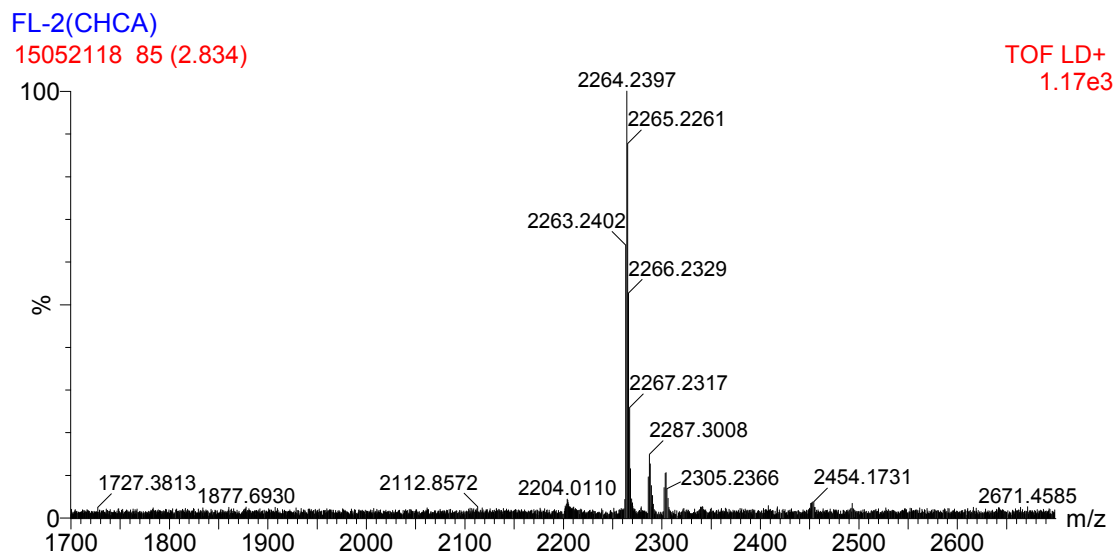

Fig. S6 MALDI-TOF MS spectrum of APOPV.

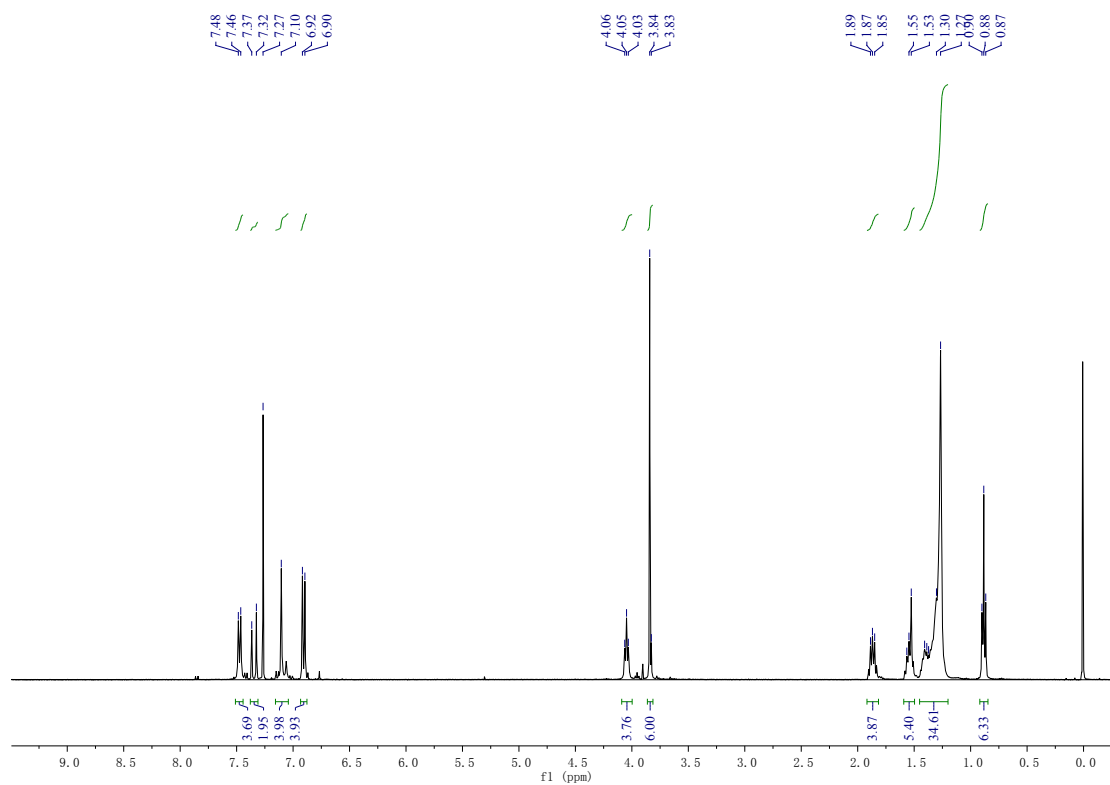

Fig. S7  $^1\text{H}$  NMR (400 MHz,  $\text{CDCl}_3$ , 298K) of AOPV.

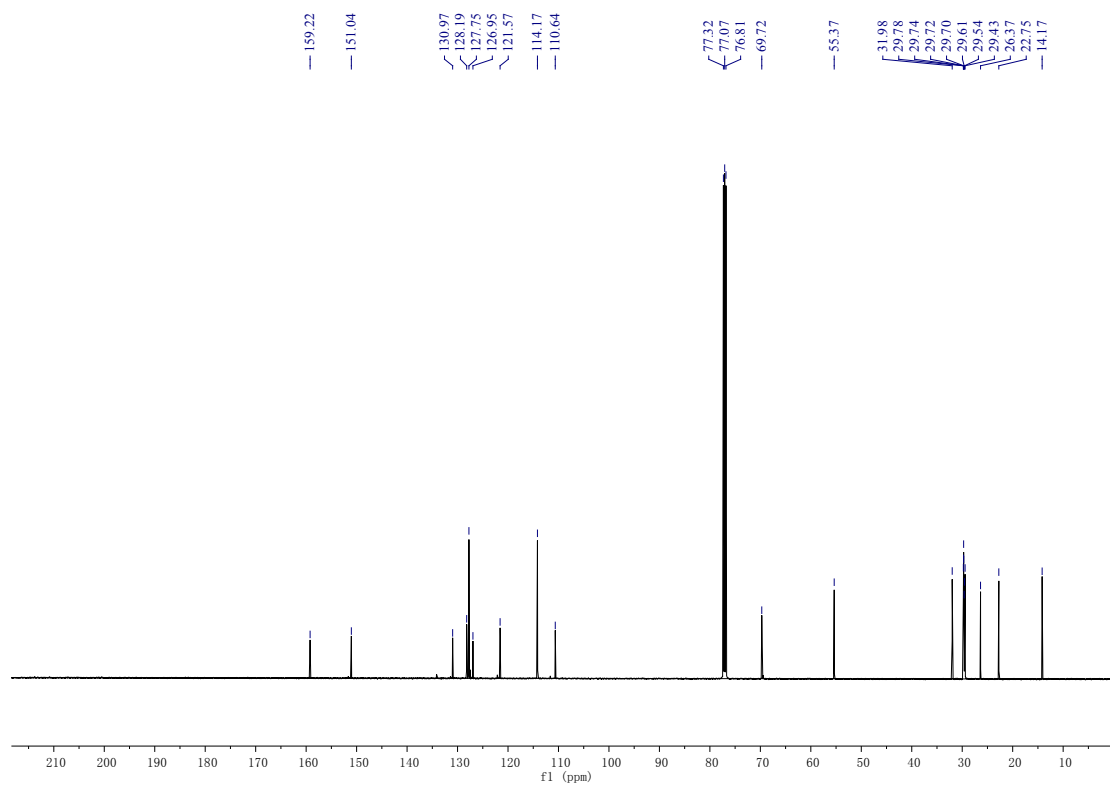

Fig. S8  $^{13}\text{C}$  NMR (126 MHz,  $\text{CDCl}_3$ , 298 K) of AOPV.

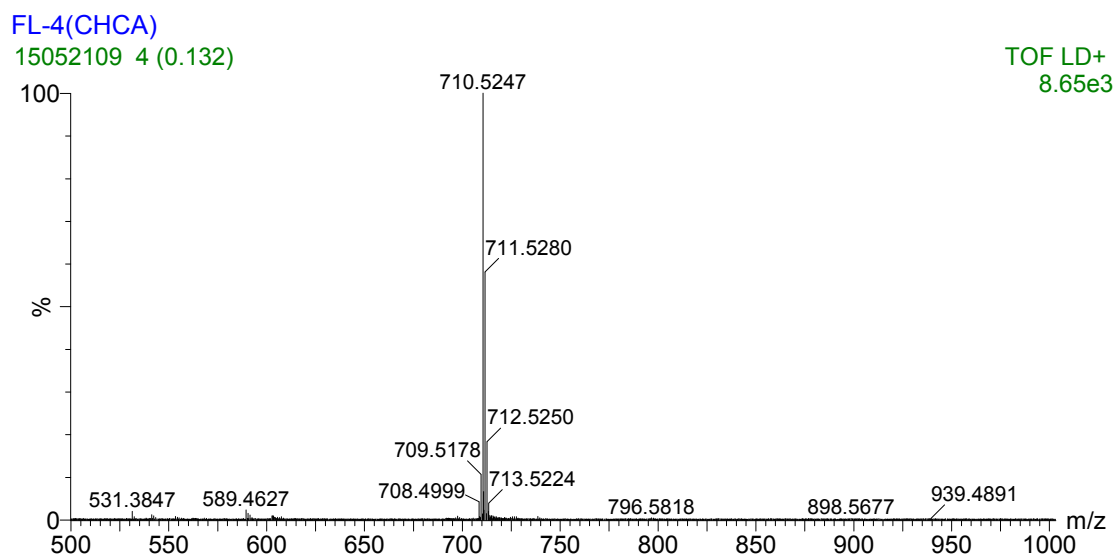

Fig. S9 MALDI-TOF MS spectrum of AOPV.

## 2. Supplementary data

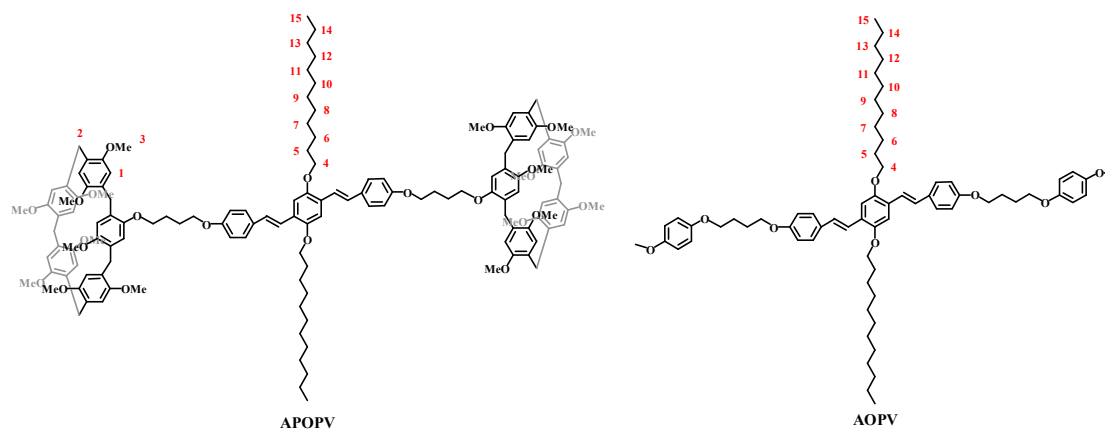

Scheme. S3 The structures of APOPV and AOPV.



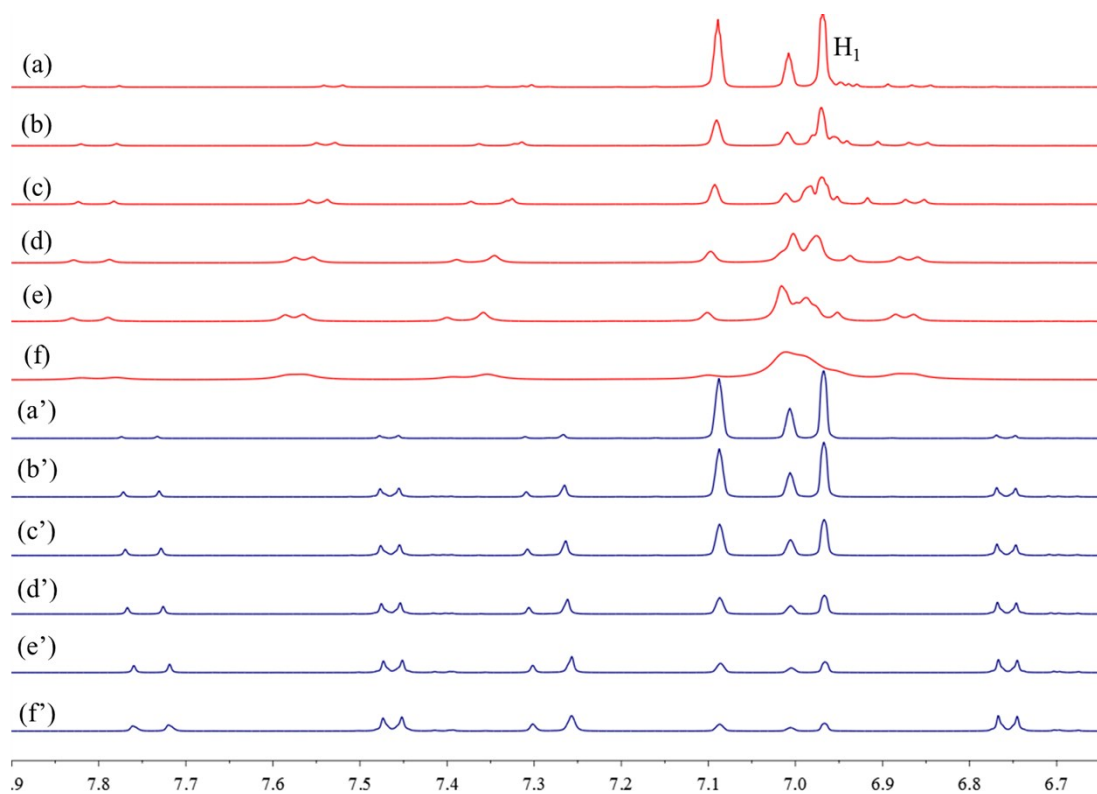

*Fig. S10* Partial  $^1\text{H}$  NMR spectra (toluene- $d_8$ , 400MHz, 298K) of **APOPV** and **AOPV** at different concentrations. **APOPV**: (a) 1.00, (b) 5.00, (c) 10.0, (d) 20.0, (e) 40.0, (f) 60 mM; **AOPV**: (a') 1.00, (b') 5.00, (c') 10.0, (d') 20.0, (e') 40.0, (f') 60 mM.

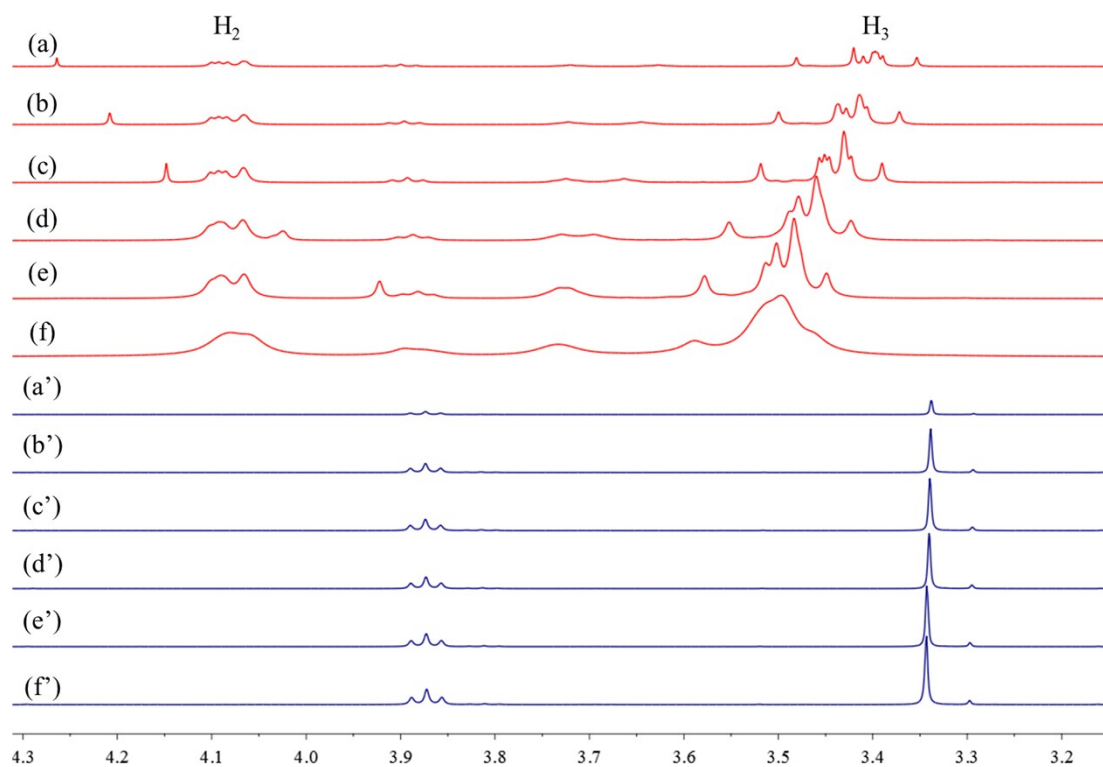

*Fig. S11* Partial  $^1\text{H}$  NMR spectra (toluene- $\text{d}_8$ , 400MHz, 298K) of **APOPV** and **AOPV** at different concentrations. **APOPV**: (a) 1.00, (b) 5.00, (c) 10.0, (d) 20.0, (e) 40.0, (f) 60 mM; **AOPV**: (a') 1.00, (b') 5.00, (c') 10.0, (d') 20.0, (e') 40.0, (f') 60 mM.

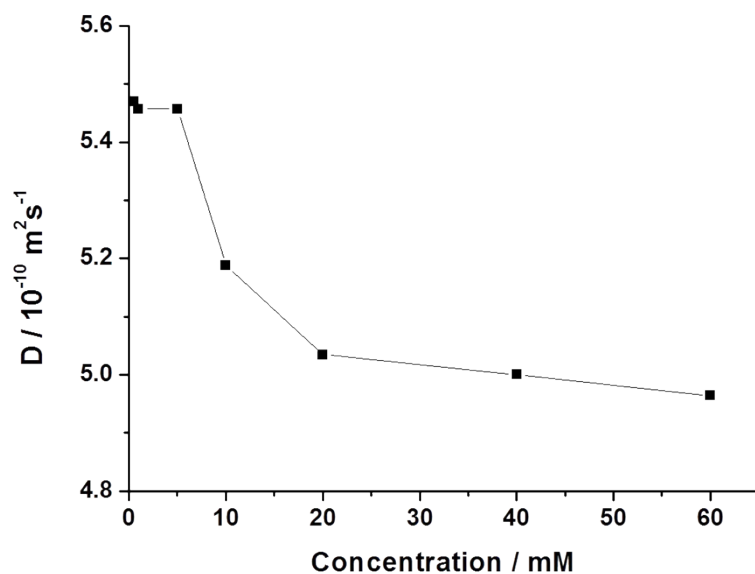

*Fig. S12* Diffusion coefficient of **AOPV** with different concentrations recorded in toluene-d8 at 25 °C.

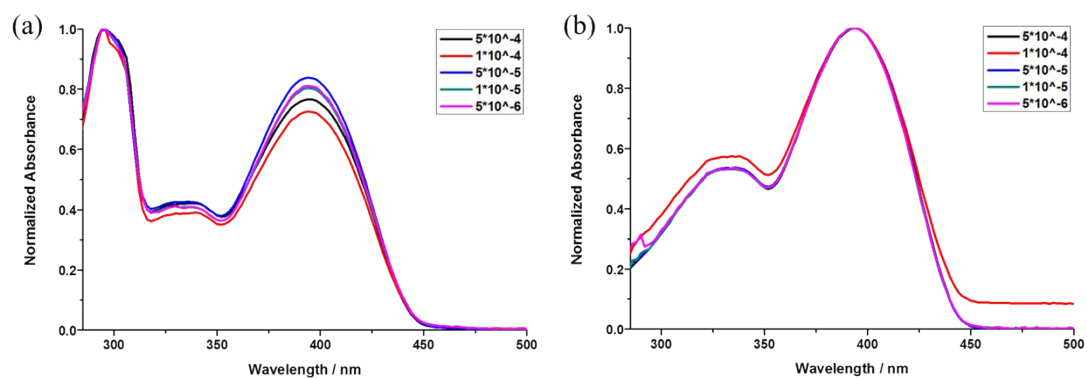

*Fig. S13* UV-Vis spectra of **APOPV** (a) and **AOPV** (b) at different concentration.

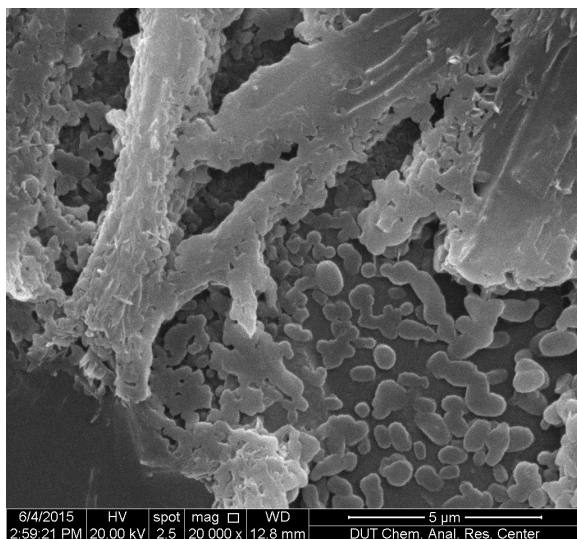

*Fig. S14* The SEM images of **APOPV** solvent in  $10^{-3}$  M.

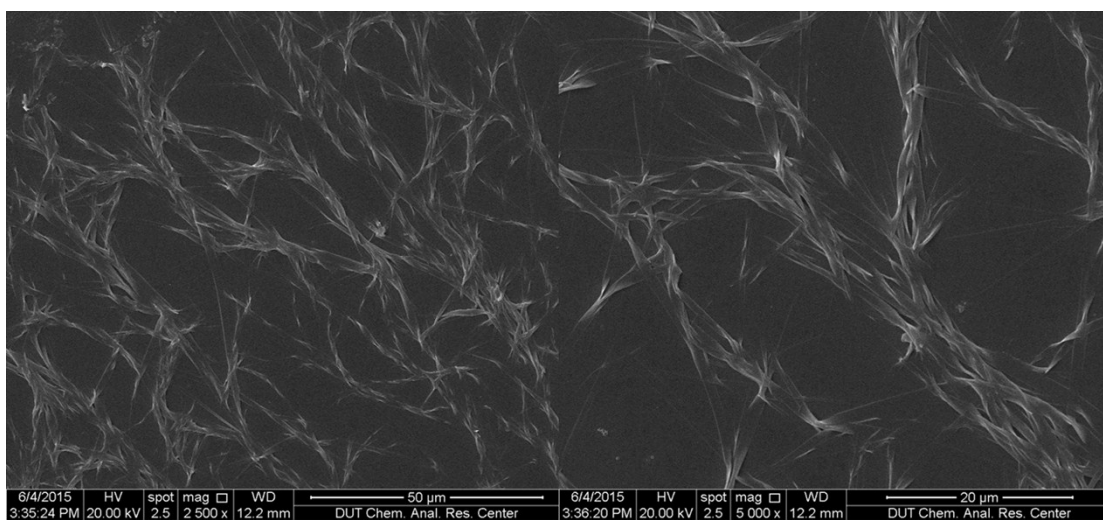

*Fig. S15* The SEM images of **AOPV** solvent in  $10^{-3}$  M.

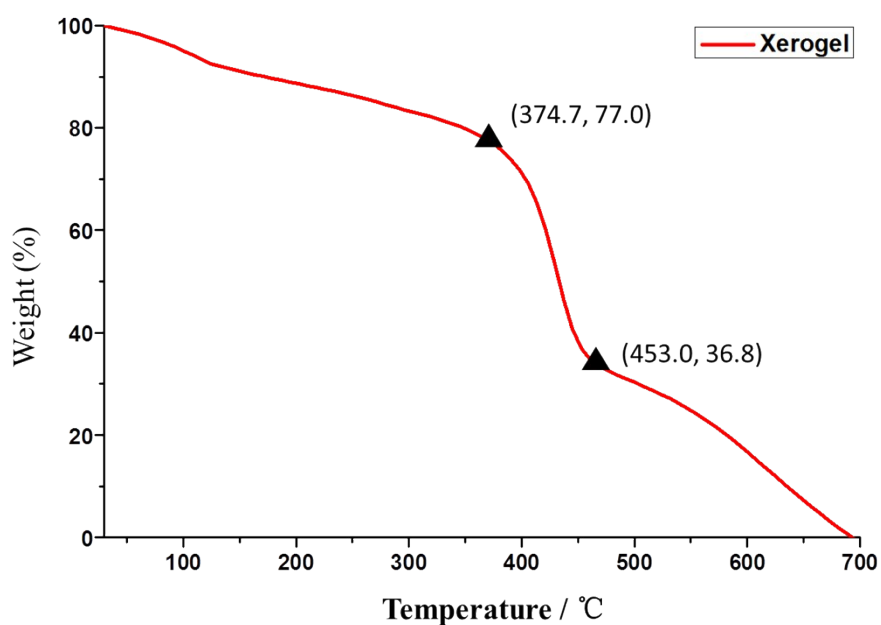

*Fig. S16* Thermogravimetric analysis (TGA) of the supramolecular xerogels of **APOPV**.

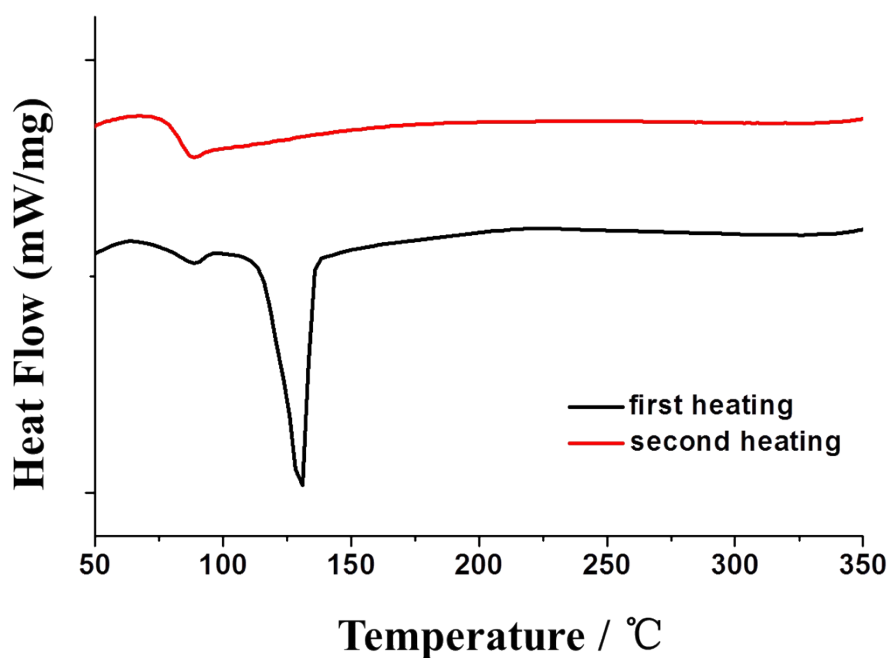

*Fig. S17* Differential scanning calorimetry (DSC) of the supramolecular xerogels of **APOPV**.

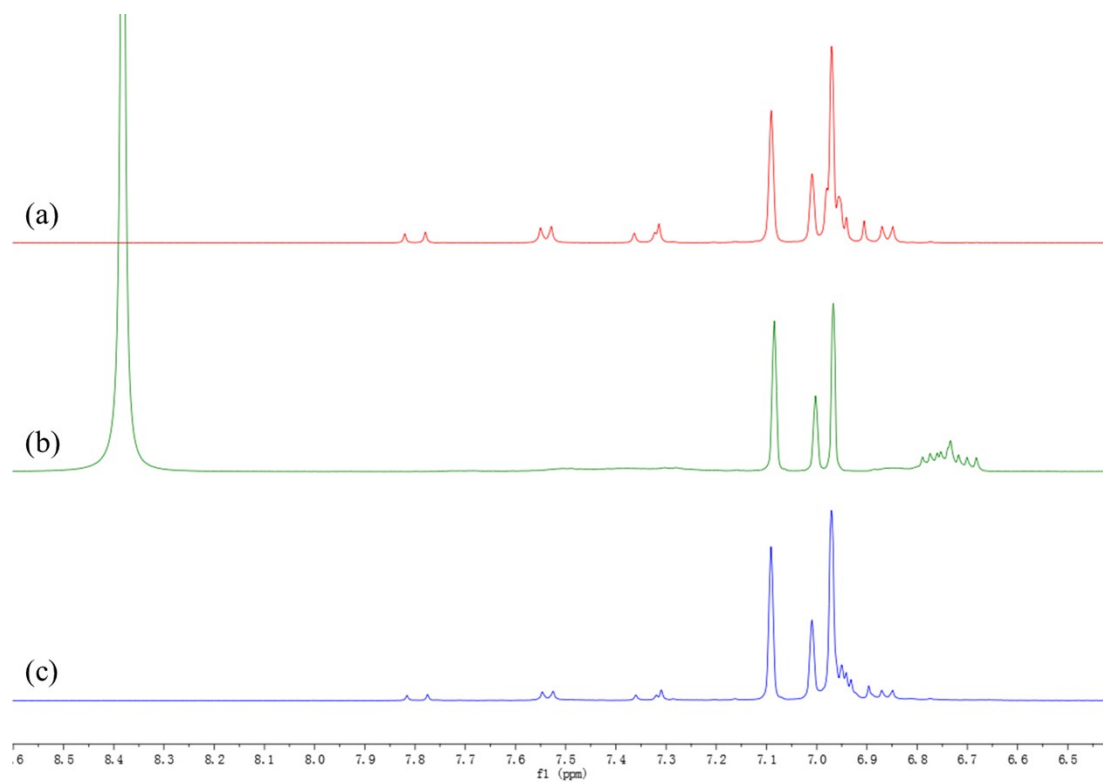

*Fig. S18* Partial  $^1\text{H}$  NMR spectra (toluene- $\text{d}_8$ , 400MHz, 298K) of **APOPV**: (a) pure **APOPV** (5 mM); (b) after addition of 5  $\mu\text{L}$  (25 equiv.) of TFA to a; (c) after addition of 20  $\mu\text{L}$  (55 equiv.) of TEA to b.

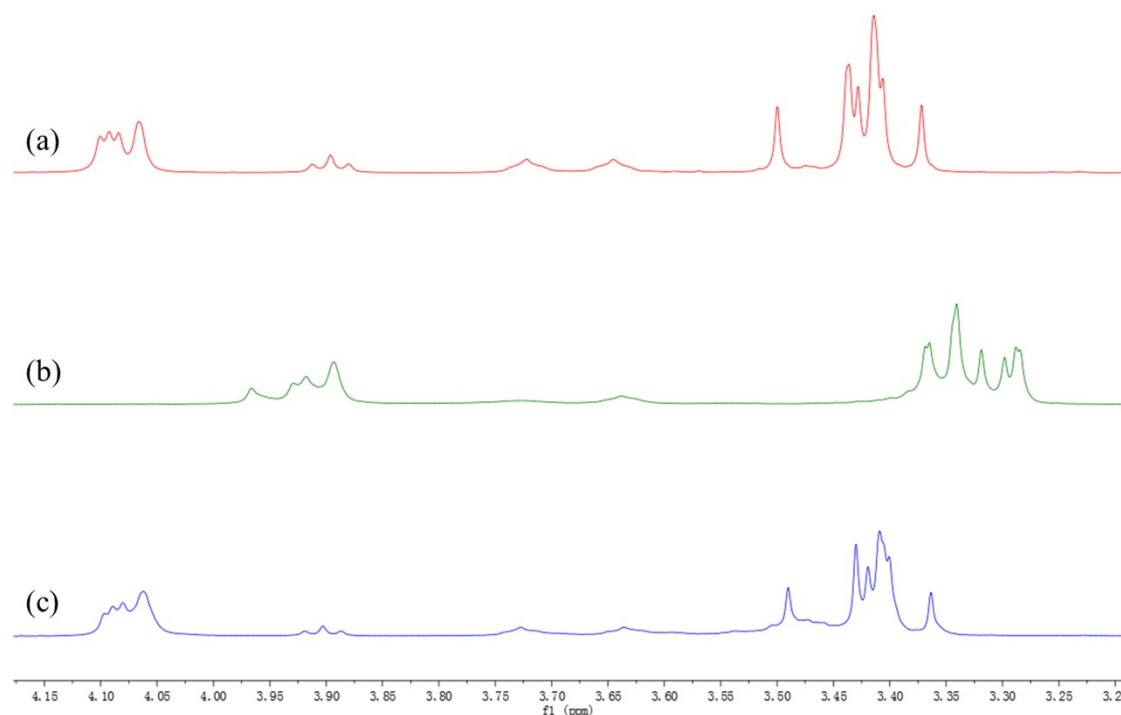

*Fig. S19* Partial  $^1\text{H}$  NMR spectra (toluene- $d_8$ , 400MHz, 298K) of **APOPV**: (a) pure **APOPV** (5 mM); (b) after addition of 5  $\mu\text{L}$  (25 equiv.) of TFA to a; (c) after addition of 20  $\mu\text{L}$  (55 equiv.) of TEA to b.

### 3. Determination of the associate constants

NMR titrations were performed to determinate the binding constants ( $K_a$ ) between pillar[5]arene (**P5A**) and alkyl chain (**G**) in toluene. Therefor we used dimethylpillar[5]arene as host and the concentration of **P5A** was constant. The 1-dodecyloxy-4-methoxy benzene was synthesized as guest and its concentration was varied. Using the nonlinear curve-fitting method,<sup>[S4]</sup> the associate constants can be obtained from the following equation:

$$A = (A_{\infty}/[P5A]) * (0.5[G] + 0.5([P5A] + 1/K_a) - (0.5 * ([G]^2 + (2[G](1/K_a - [P5A])) + (1/K_a + [P5A])^2)^{0.5}))$$

Where  $A$  is the chemical shift change of H3 on the pillar[5]arene,  $A_{\infty}$  is the chemical shift change of H3 when the host is completely complexed,  $[P5A]$  is the fixed concentration of the host, and  $[G]$  is the concentration of the guest 1-dodecyloxy-4-methoxy benzene.

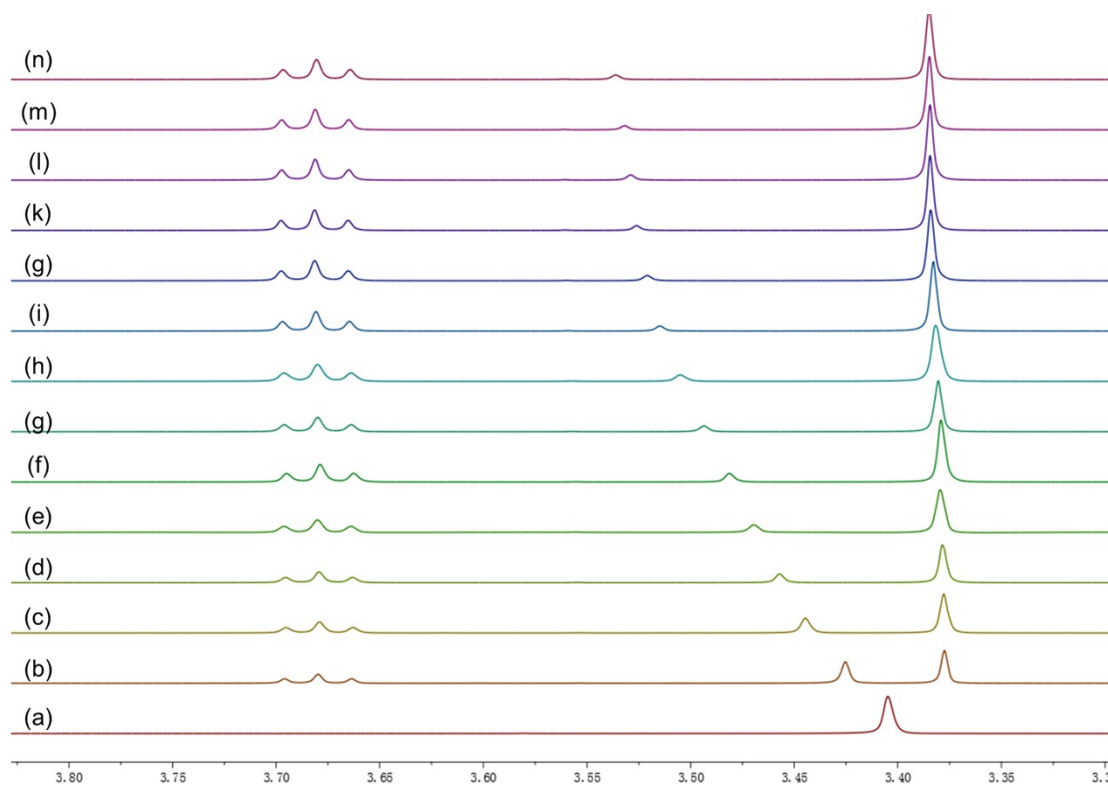

*Fig. S20* Partial  $^1\text{H}$  NMR spectra (toluene- $d_8$ , 400MHz, 298K) of **P5A** at a concentration of 2 mM upon addition of the guest 1-dodecyloxy-4-methoxy benzene: (a) 0 mM; (b) 10 mM; (c) 20 mM; (d) 30 mM; (e) 40 mM; (f) 50 mM; (g) 60 mM; (h) 70 mM; (i) 80 mM; (j) 90 mM; (k) 100 mM; (l) 110 Mm; (m) 120 mM; (n) 150 mM.



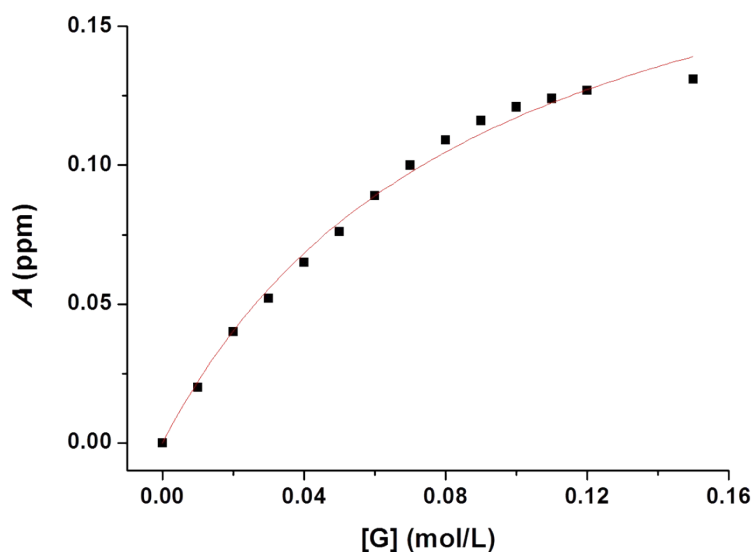

Fig. S21 The non-linear curve-fitting for the complexation of P5A host (2 mM) with guest 1-dodecyloxy-4-methoxy benzene at different concentration.

- S1 M. A. Mezour, I. I. Perepichka, J. Zhu, R. B. Lennox and D. F. Perepichka, *ACS nano*, 2014, 8, 2214-2222.  
 S2 B. Narayan, S. P. Senanayak, A. Jain, K. S. Narayan, and S. J. George, *Adv. Funct. Mater.*, 2013, 23, 3053-3060.  
 S3 L. Liu, D. Cao, Y. Jin, H. Tao, and H. Meier, *Org. Biomol. Chem.*, 2011, 9, 7007-7010.  
 S4 C. Li, L. Zhao, J. Li, X. Ding, S. Chen, Q. Zhang, Y. Yu and X. Jia, *Chem. Commun.*, 2010, 46, 9016-9018.
